# Supplementary material
Source: Elsevier journal article supplement (https://www.sciencedirect.com/science/article/pii/S0211563819300264)
Supplement: mmc1 [file S0211563819300264:mmc1.pdf]

Tabla online; Declaración Strengthening the Reporting of Observational Studies in Epidemiology (STROBE)<sup>15</sup>

| <b>Apartado</b>                             | <b>Punto</b> | <b>Grado de cumplimiento</b>      |
|---------------------------------------------|--------------|-----------------------------------|
| <b>Título y resumen</b>                     | 1            | Cumplimiento del criterio         |
| <b>Introducción</b>                         | 2            | Cumplimiento del criterio         |
| <b>Objetivo</b>                             | 3            | Cumplimiento del criterio         |
| <b>Diseño del Estudio</b>                   | 4            | Cumplimiento del criterio         |
| <b>Contexto</b>                             | 5            | Cumplimiento parcial del criterio |
| <b>Participantes</b>                        | 6            | Cumplimiento del criterio         |
| <b>Variable</b>                             | 7            | Cumplimiento parcial del criterio |
| <b>Fuentes de datos</b>                     | 8            | Cumplimiento del criterio         |
| <b>Sesgos</b>                               | 9            | Cumplimiento parcial del criterio |
| <b>Tamaño Muestral</b>                      | 10           | Cumplimiento del criterio         |
| <b>Variable cuantitativas</b>               | 11           | Cumplimiento del criterio         |
| <b>Método estadístico</b>                   | 12           | Cumplimiento del criterio         |
| <b>Participantes</b>                        | 13           | Cumplimiento del criterio         |
| <b>Datos Descriptivos</b>                   | 14           | Cumplimiento del criterio         |
| <b>Datos de las variables de resultados</b> | 15           | Cumplimiento del criterio         |
| <b>Resultados principales</b>               | 16           | Cumplimiento del criterio         |
| <b>Otros análisis</b>                       | 17           | Cumplimiento del criterio         |
| <b>Resultados Claves</b>                    | 18           | Cumplimiento del criterio         |
| <b>Limitaciones</b>                         | 19           | Cumplimiento del criterio         |
| <b>Interpretación</b>                       | 20           | Cumplimiento del criterio         |
| <b>Generalidades</b>                        | 21           | Cumplimiento parcial del criterio |
| <b>Financiación</b>                         | 22           | Cumplimiento del criterio         |
